# Supplementary figures and images for: Responses of Vaginal Microbiota to Dietary Supplementation with Lysozyme and its Relationship with Rectal Microbiota and Sow Performance from Late Gestation to Early Lactation
Source: MDPI journal article supplement (doi:10.3390/ani11030593), 2021-02-24

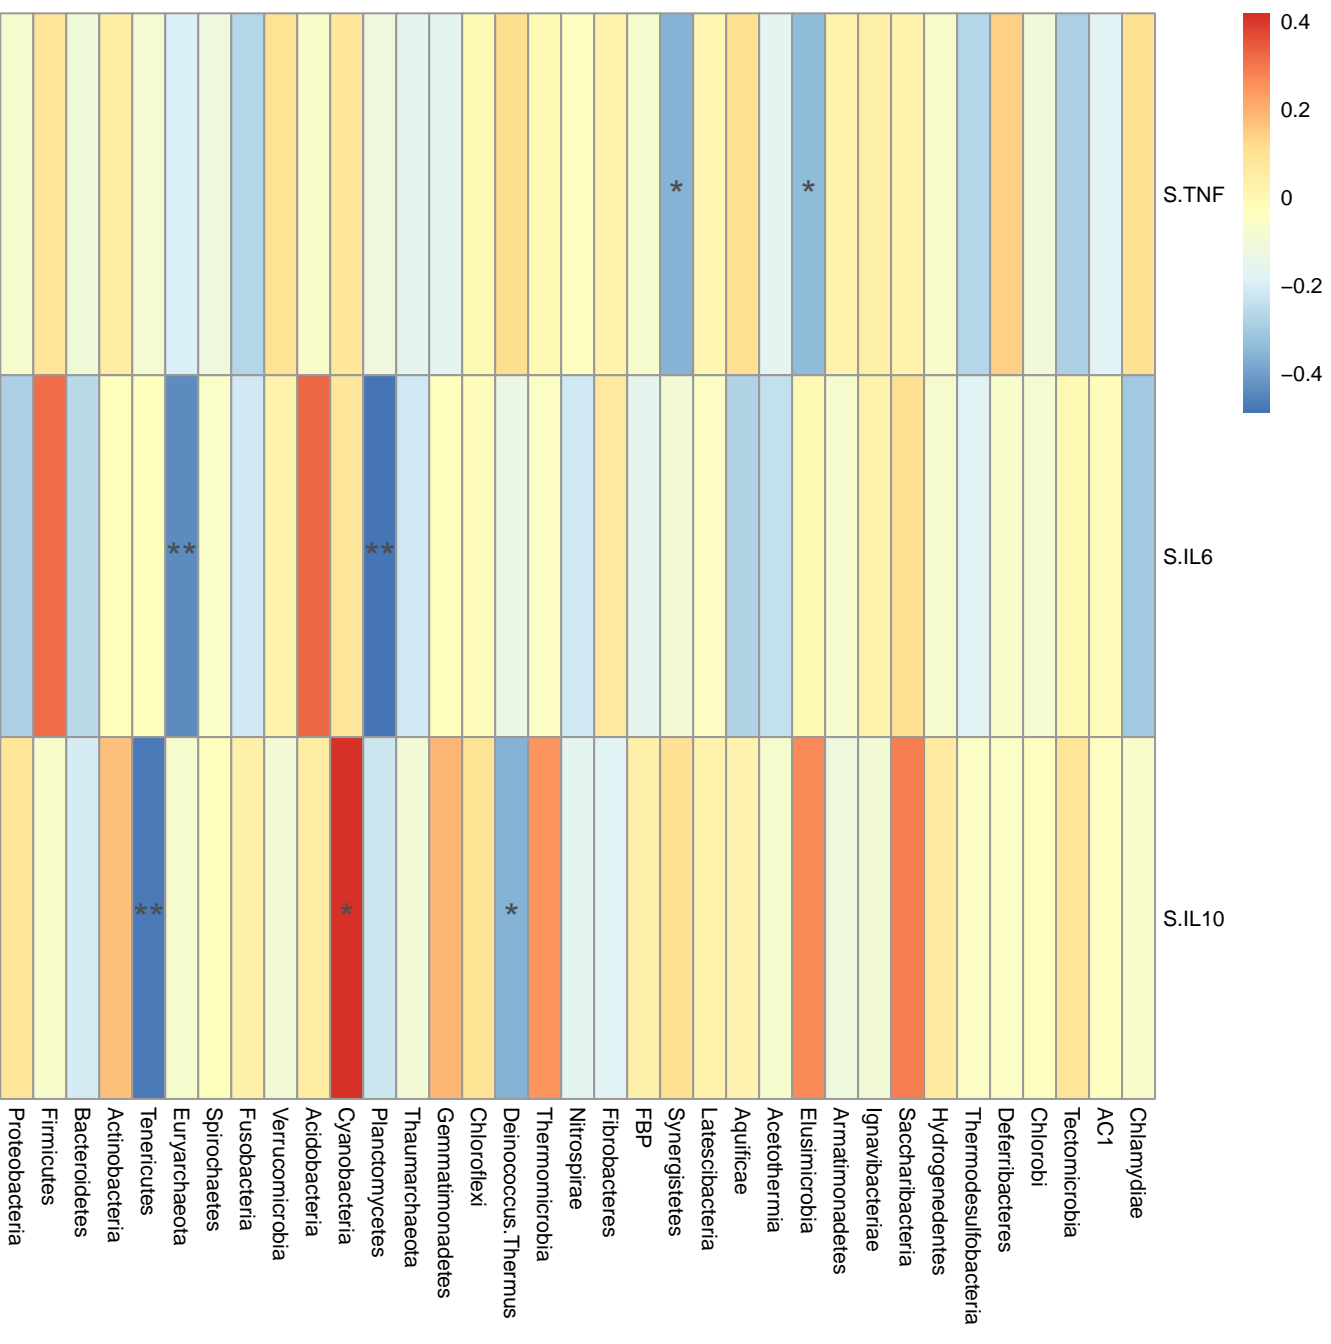

Supplement: s1 [file s1]

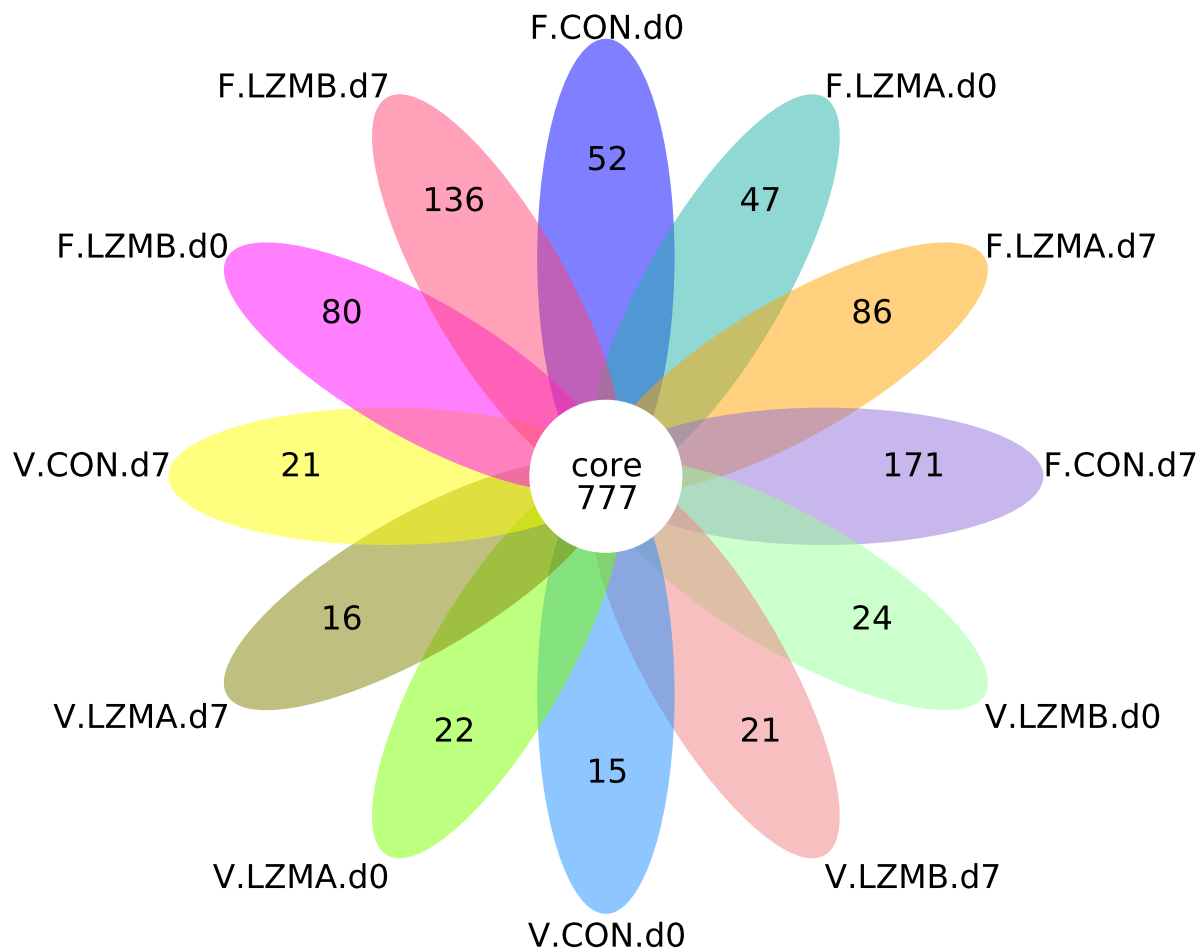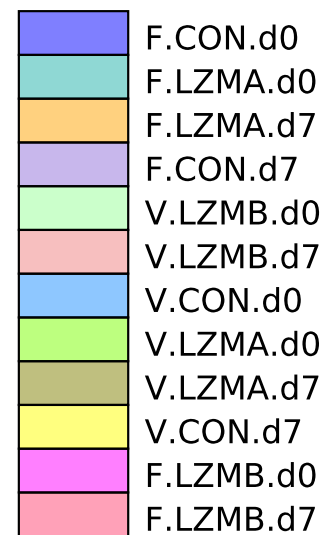

Supplement: s1 [file s1]
